# Supplementary material
Source: publisher site journal article supplement (https://www.degruyterbrill.com/publication/journal_key/MIM/downloadAsset/MIM_word_article_template.docx)
Supplement: Supplementary file 1 [file MIM_word_article_template.docx]

**Title Page**

Author names (one full given name, second name, initials with full stop and without blank)

**Title**

Author affiliations (department, institution, city, (if applicable, state abbreviated), country)

Corresponding author full postal address and email address

Running head (max. 10 words)

Number of Supplementary Material/Supplementary Tables/Figures (no limit)

**Abstract**

**Objectives:**

**Methods:**

**Results:**

**Conclusions:**

**Keywords** (3-6 keywords): XXX; XXX; XXX

**Introduction**

Plain text

**OR**

Subheadings (if applicable): use different size or color for subheadings of different hierarchy

**Materials and methods**

Subheadings: Use different size (see below) or color for subheadings of different hierarchy

**Section heading 1**

**Section heading 2**

**Section heading 3**

**Section heading 10**

**Results**

Please make sure that the results and data are consistent and correct throughout the manuscript

Subheadings: use different size (see below) or color for subheadings of different hierarchy

**Section heading 1**

**Section heading 2**

**Section heading 3**

**Section heading 10**

**Discussion**

Subheadings: use different size or color for subheadings of different hierarchy

Comment on:

- Key findings
- Comparison with and discussion of similar research
- Explanation of the results
- Impact and measures to be taken
- Strengths and Limitations

**Conclusions**

**References**

[IEEE Reference style](https://www.degruyter.com/publication/journal_key/MIM/downloadAsset/MIM_IEEE%20Reference%20style%20fullguide.pdf)

**Figures and Tables & Legends**

**Figure 1:** XXXXX.

In case of multi-part figures, provide a main caption and part figure captions with capital letters in parentheses referring to the same capital letters in the part figures.

**Figure 1:** XXXXX. (A) XXXXX. (B) XXXXX.

**Table 1:** Title.

Table

Footnote (if applicable).

**Supplementary Material**

If applicable. Must be always uploaded as separate file(s).

**Template for Ethical and Legal Declarations**

[Template for Ethical and Legal Declarations](https://www.degruyter.com/publication/journal_key/MIM/downloadAsset/MIM_Template%20for%20Ethical%20and%20Legal%20Declarations%20MIM.docx)

**Footnote**

(If applicable)
